# Supplementary material for: Differentiation of Oligodendrocyte Precursor Cells from Sox10-Venus Mice to Oligodendrocytes and Astrocytes
Source: PubMed Central journal article supplement (PMC5658394; doi:10.1038/s41598-017-14207-0), 2017-10-26

## SUPPLEMENTAL INFORMATION

### **Differentiation of Oligodendrocyte Precursor Cells from *Sox10*-Venus Mice to Oligodendrocytes and Astrocytes**

Nobuharu Suzuki<sup>1¶</sup>, Kaori Sekimoto<sup>1¶</sup>, Chikako Hayashi<sup>1</sup>, Yo Mabuchi<sup>1</sup>, Tetsuya Nakamura<sup>2</sup>, and Chihiro Akazawa<sup>1\*</sup>

<sup>1</sup>Department of Biochemistry and Biophysics, Graduate School of Health Care Sciences, Tokyo Medical and Dental University, Tokyo, Japan, <sup>2</sup>Department of Gastroenterology and Hepatology, Tokyo Medical and Dental University, Tokyo, Japan/Department of Advanced Therapeutics for GI Diseases, Tokyo Medical and Dental University, Tokyo, Japan

\* Corresponding author

E-mail: [c.akazawa.bb@tmd.ac.jp](mailto:c.akazawa.bb@tmd.ac.jp) (CA)

¶ These authors equally contributed to this work.

**Supplementary Video 1:** Time-lapse analysis of cell process formation of differentiating Venus (+) cells

**Supplementary Video 2:** Time-lapse analysis of cell division of Venus (+) cells

**Supplementary Figure S1:** PDGFR $\alpha$  and A2B5 staining in Venus (+) cells

**Supplementary Figure S2:** Staining for proliferation markers in Venus (+) cells before induction of differentiation

**Supplementary Figure S3:** Distribution of Venus (+) cells in the brain

**Supplementary Video 1. Time-lapse analysis of cell process formation of differentiating Venus (+) cells.** The 30 seconds-movie was created using Z-stack images collected every 20 minutes for 50 hours, as described in Methods.

**Supplementary Video 2. Time-lapse analysis of cell division of Venus (+) cells.** The 30 seconds-movie was created using Z-stack images collected every 20 minutes for 100 minutes.

**Supplementary Figure S1. PDGFR $\alpha$  and A2B5 staining in Venus (+) cells.** (a) Immunocytochemical images of purified Venus (+) cells before induction of differentiation. Venus fluorescence is shown in green, and each glial marker is shown in red. Scale bar, 50  $\mu$ m. (b) Immunohistochemistry in the corpus callosum of the P0 posterior forebrain, showing the distribution of Venus positive cells (green) with PDGFR $\alpha$  (red). Scale bar: 50  $\mu$ m.

**Supplementary Figure S2. Staining for proliferation markers in Venus (+) cells before induction of differentiation.** (a) Immunocytochemistry of Ki67 and BrdU before induction of differentiation. Venus fluorescence is shown in green, and each marker is shown in red. Scale bar, 25  $\mu$ m. (b) Cell count analysis showing percentage of proliferative Venus (+) cells. Error bars, s.e.m.

**Supplementary Figure S3. Distribution of Venus (+) cells in the brain.** Fluorescence images of Venus (green) and DAPI (blue) on coronal sections of posterior brains at P0 and P20. CC: corpus callosum; ST: striatum; Scale bars: 1 mm.

# Supplementary Figure S1

**a**

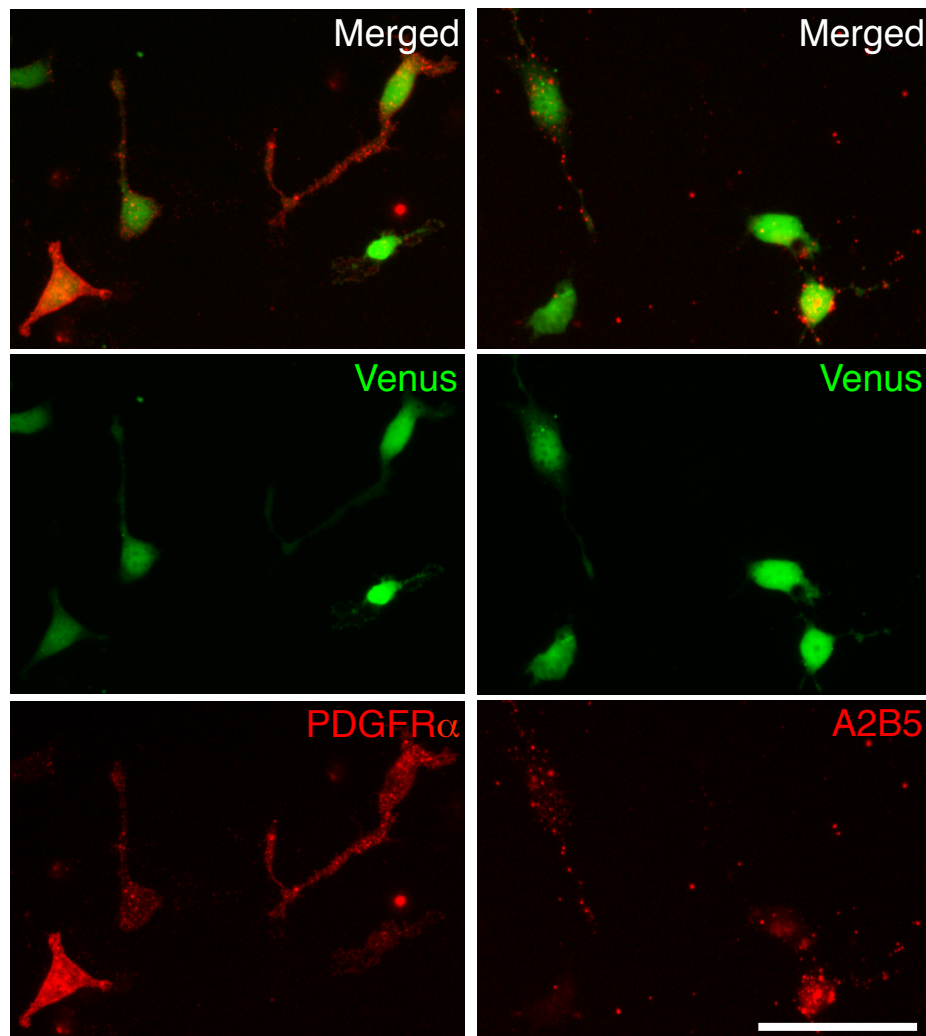

**b**

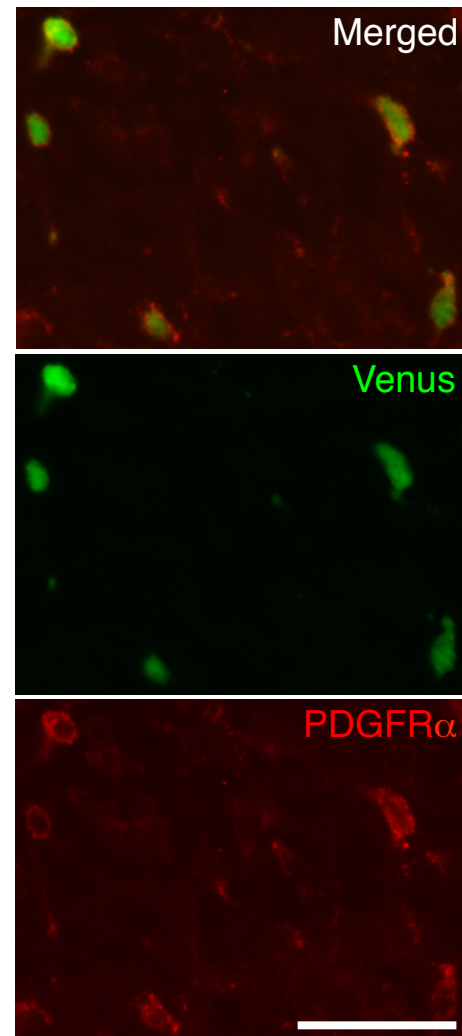

# Supplementary Figure S2

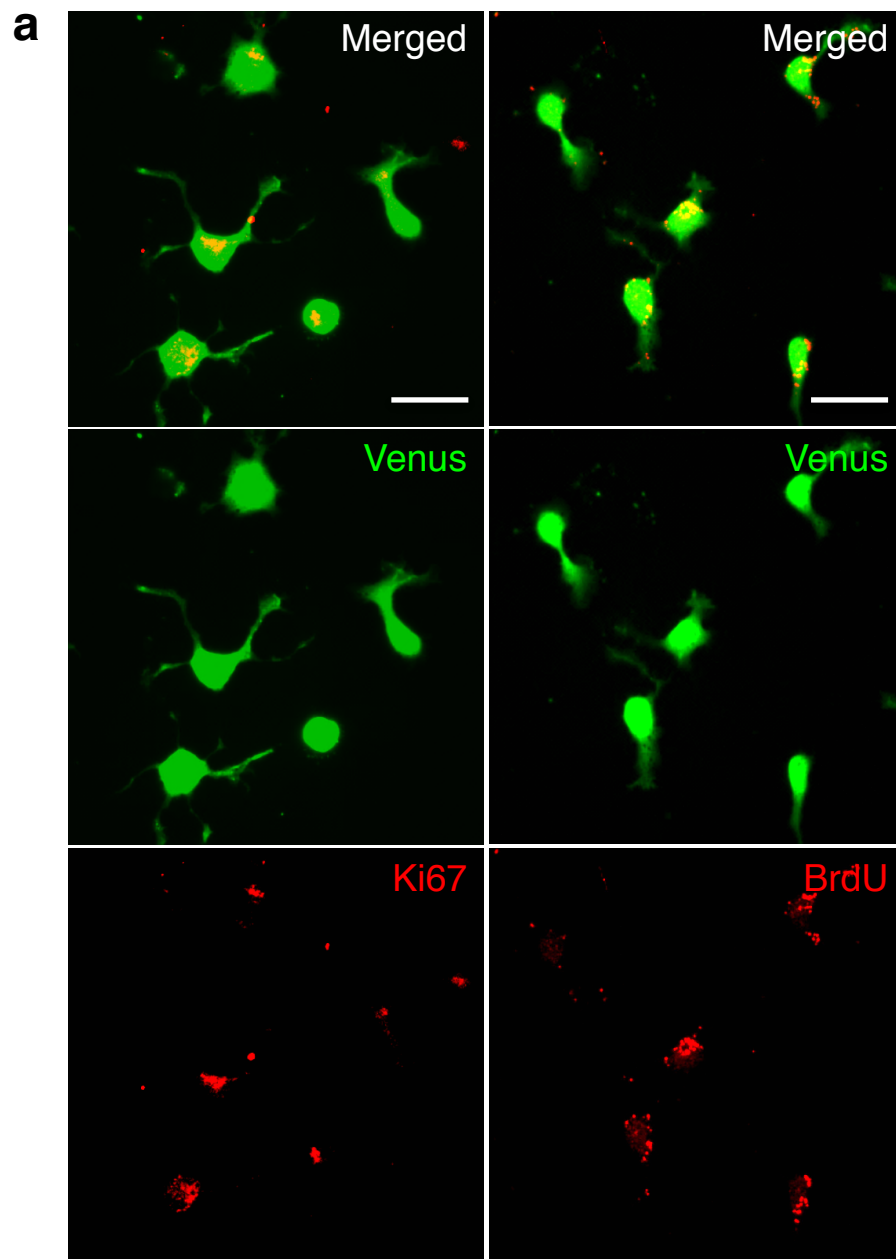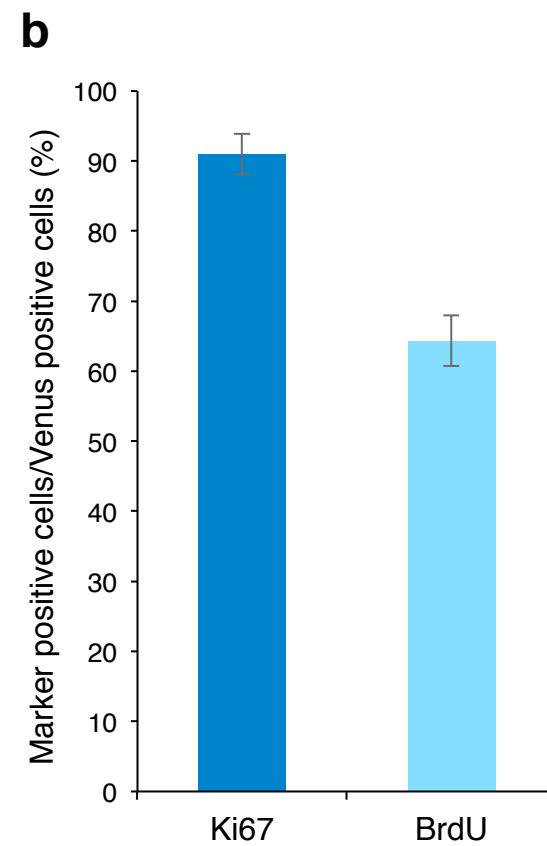

# Supplementary Figure S3

P0

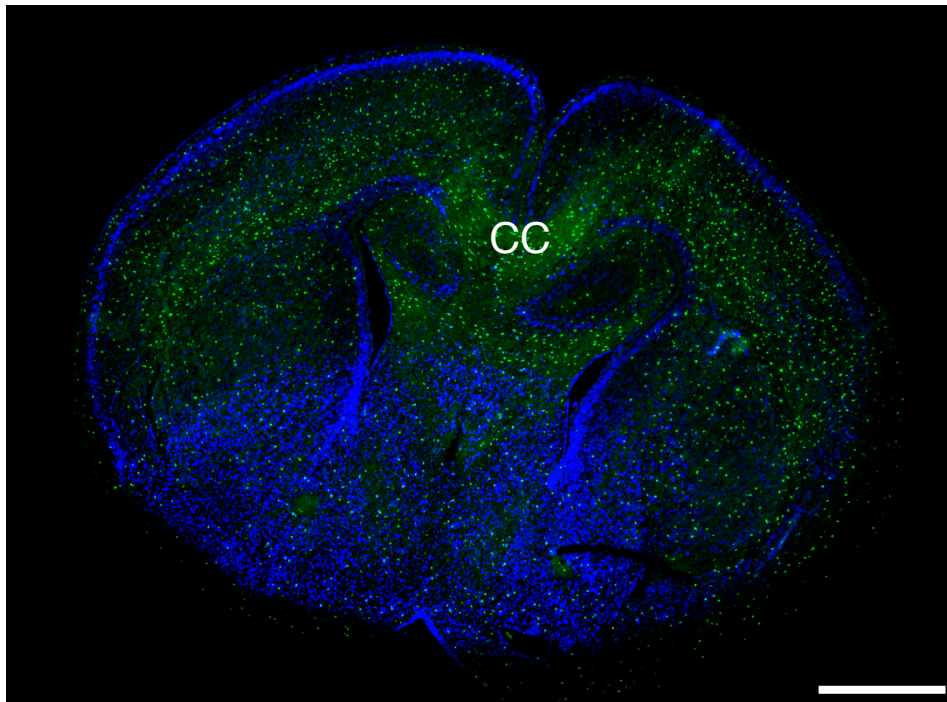

P20

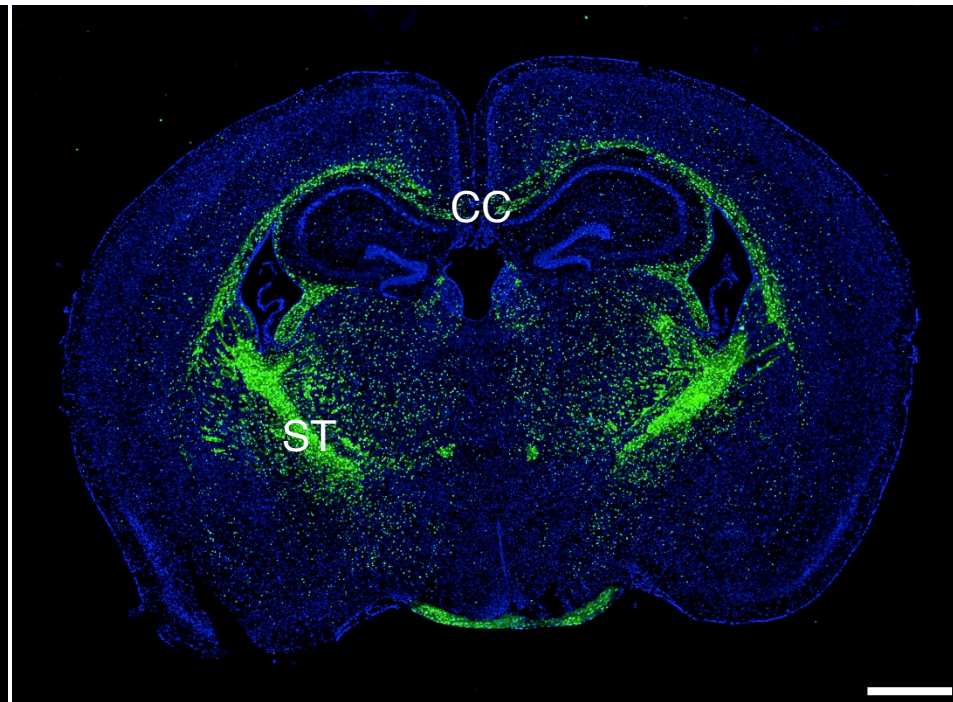

Supplement: 41598_2017_14207_MOESM3_ESM.pdf [file 41598_2017_14207_MOESM3_ESM.pdf]
